# Supplementary material for: Timing of Home Health Care Initiation and 30-Day Rehospitalizations among Medicare Beneficiaries with Diabetes by Race and Ethnicity
Source: Preprints.org preprint supplement (doi:10.20944/preprints202102.0017.v1), 2021-02-01
Supplement: Supplementary file 1 [file supplementary]

| **Ninth Revision, Clinical Modification (ICD-9-CM)** | **Tenth Revision, Clinical Modification (ICD-10-CM)** |
| --- | --- |
| Diabetes mellitus: 250xx | Diabetes mellitus: E11xx |
| Cardiovascular diseases: 410-414, 39891, 426-428, 7850, 7851, 430–438, 401–405, 4372, 415–417, 429, 440–444, 446–448, 451–453, 458-459, 557, 7859, 7865, 7943, 7962 | Cardiovascular diseases: G45, 58; I09-13,15, 20-21, 23-28, 44-45, 47-51, 62-63, 65-67, 70-75, 77-78, 80-82, 87, 69, 95, 97, 99; K55; M30-31; R00, 03, 07, 09, 58, 94 |
| Renal diseases: 580–586, 590, 595, 597, 59800, 59801, 5990 | Renal diseases: N00-05, 08, 10, 11, 16-19, 30, 34-35, 37, 39 |
| Lower extremity diseases and complications: 0201, 0210, 0220, 0311, 03285, 035, 0390, 337, 342–344, 354, 355, 3568, 3569, 3572, 3581, 4402, 4423, 4438, 4439, 44422, 44502, 4510, 4512, 454, 680–682, 684–686, 690, 694–698, 700–703, 707, 709, 711, 7184, 7271, 730, 735, 736, 7396, 7854 | Lower extremity diseases and complications: A20, 21, 31, 36; E08-11, 13, 83; G56-60, 73, 80-83, 90; I83, 96; L00-03, 05, 08-13, 20-21, 26, 28-30, 40, 42-44, 49, 51-53, 57, 60, 66, 71, 80-85, 87, 89-95, 97-98; M00-02, 20-21, 24, 46, 57, 66, 83, 85-87, 89-92 |
| Eye diseases and vision defects: 361, 362, 365–369 | Eye diseases and vision defects: E113, 09-11, 13; H26, 28, 36, 250-252, 258-262, 311, 330-334, 338, 340-2, 348-359, 400-406, 408-9, 520, 523-527, 530-536, 538-548; Q150 |
| Mycoses: 110–112, 1141, 1143, 1149, 115-118 | Mycoses: B35-49 |
| Fluid and electrolytes: 276 | Fluid and electrolytes: E86-87 |

Table S1. International Classification of Diseases Codes (ICD-9 and ICD-10) used to identify diabetes-related index hospitalizations.

Note: As of October 1, 2015, the United States transitioned to the ICD-10-CM coding system. Diabetes-related hospitalizations were defined by a primary admitting diagnosis of diabetes or a secondary diagnosis of diabetes combined with a diabetes-related condition including cardiovascular, renal, lower extremity, or eye diseases [18].
